# Supplementary material for: Effect of Serum Lipid Profile on the Risk of Breast Cancer: Systematic Review and Meta-Analysis of 1,628,871 Women
Source: MDPI journal article supplement (doi:10.3390/jcm11154503), 2022-08-02
Supplement: s1 [file s1]

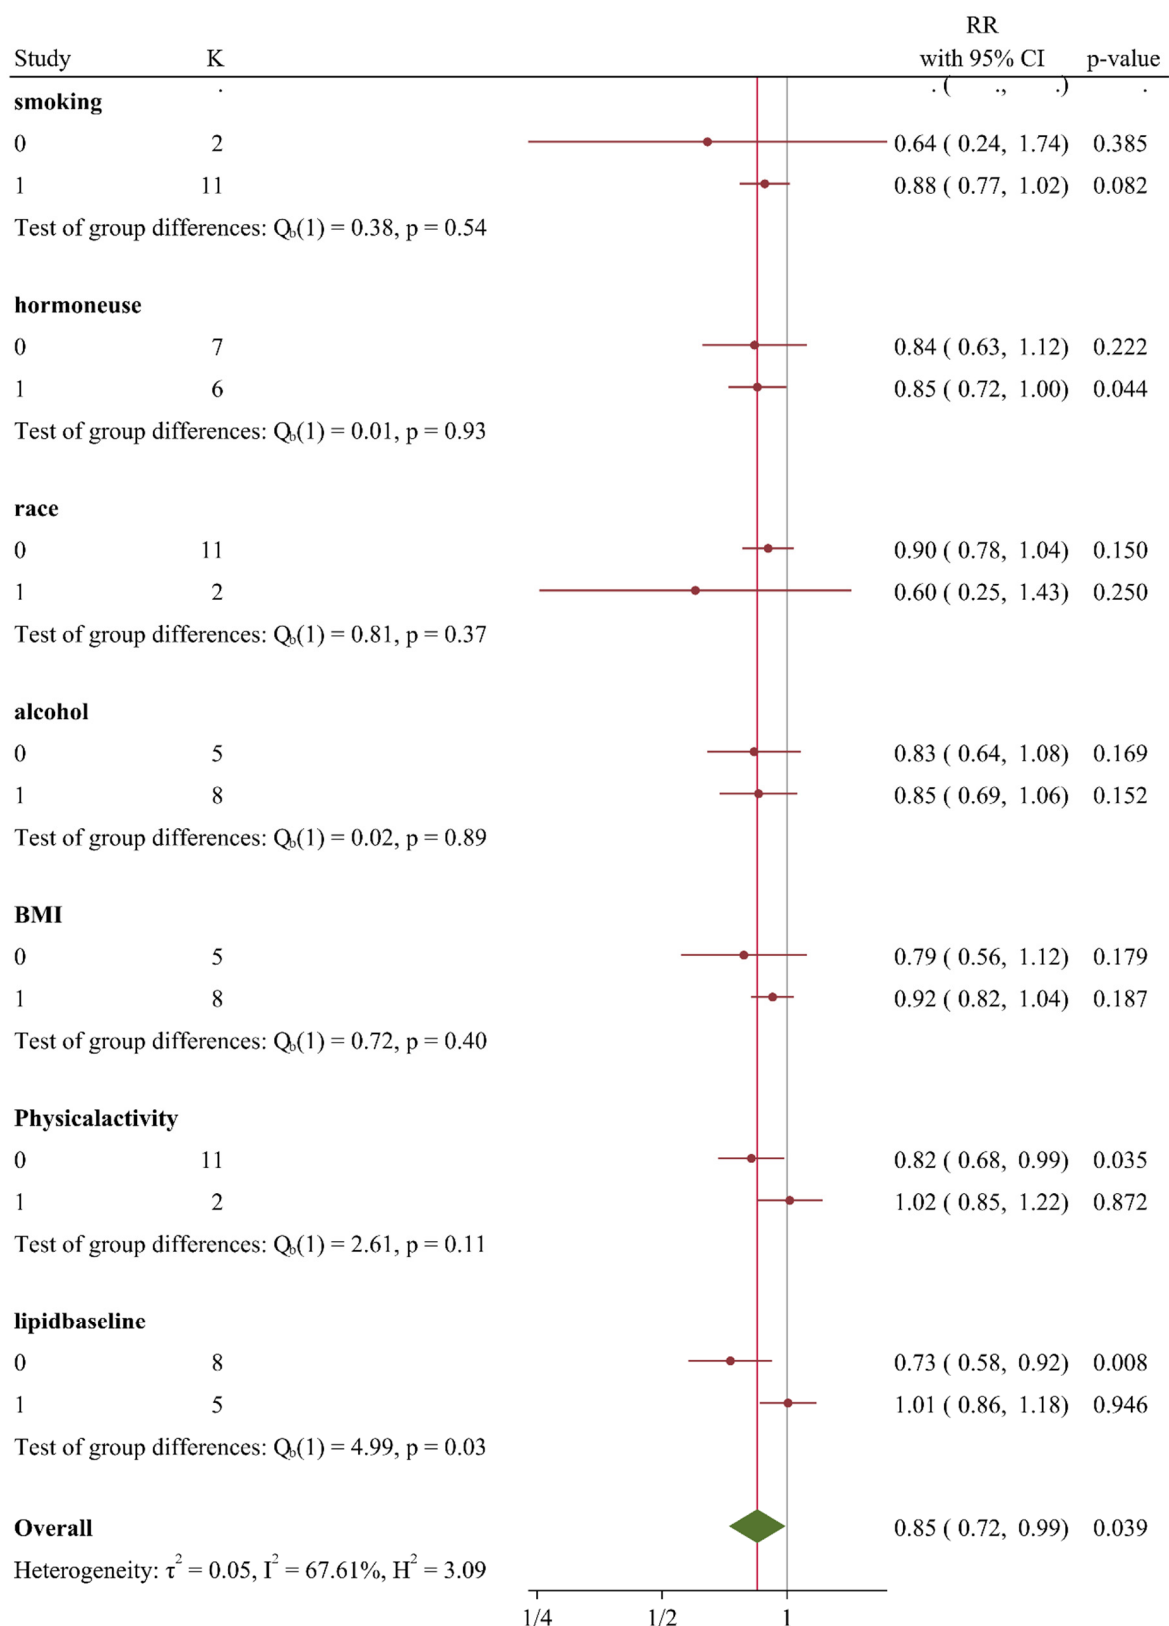

Figure S1. Subgroup analysis for HDL-C.

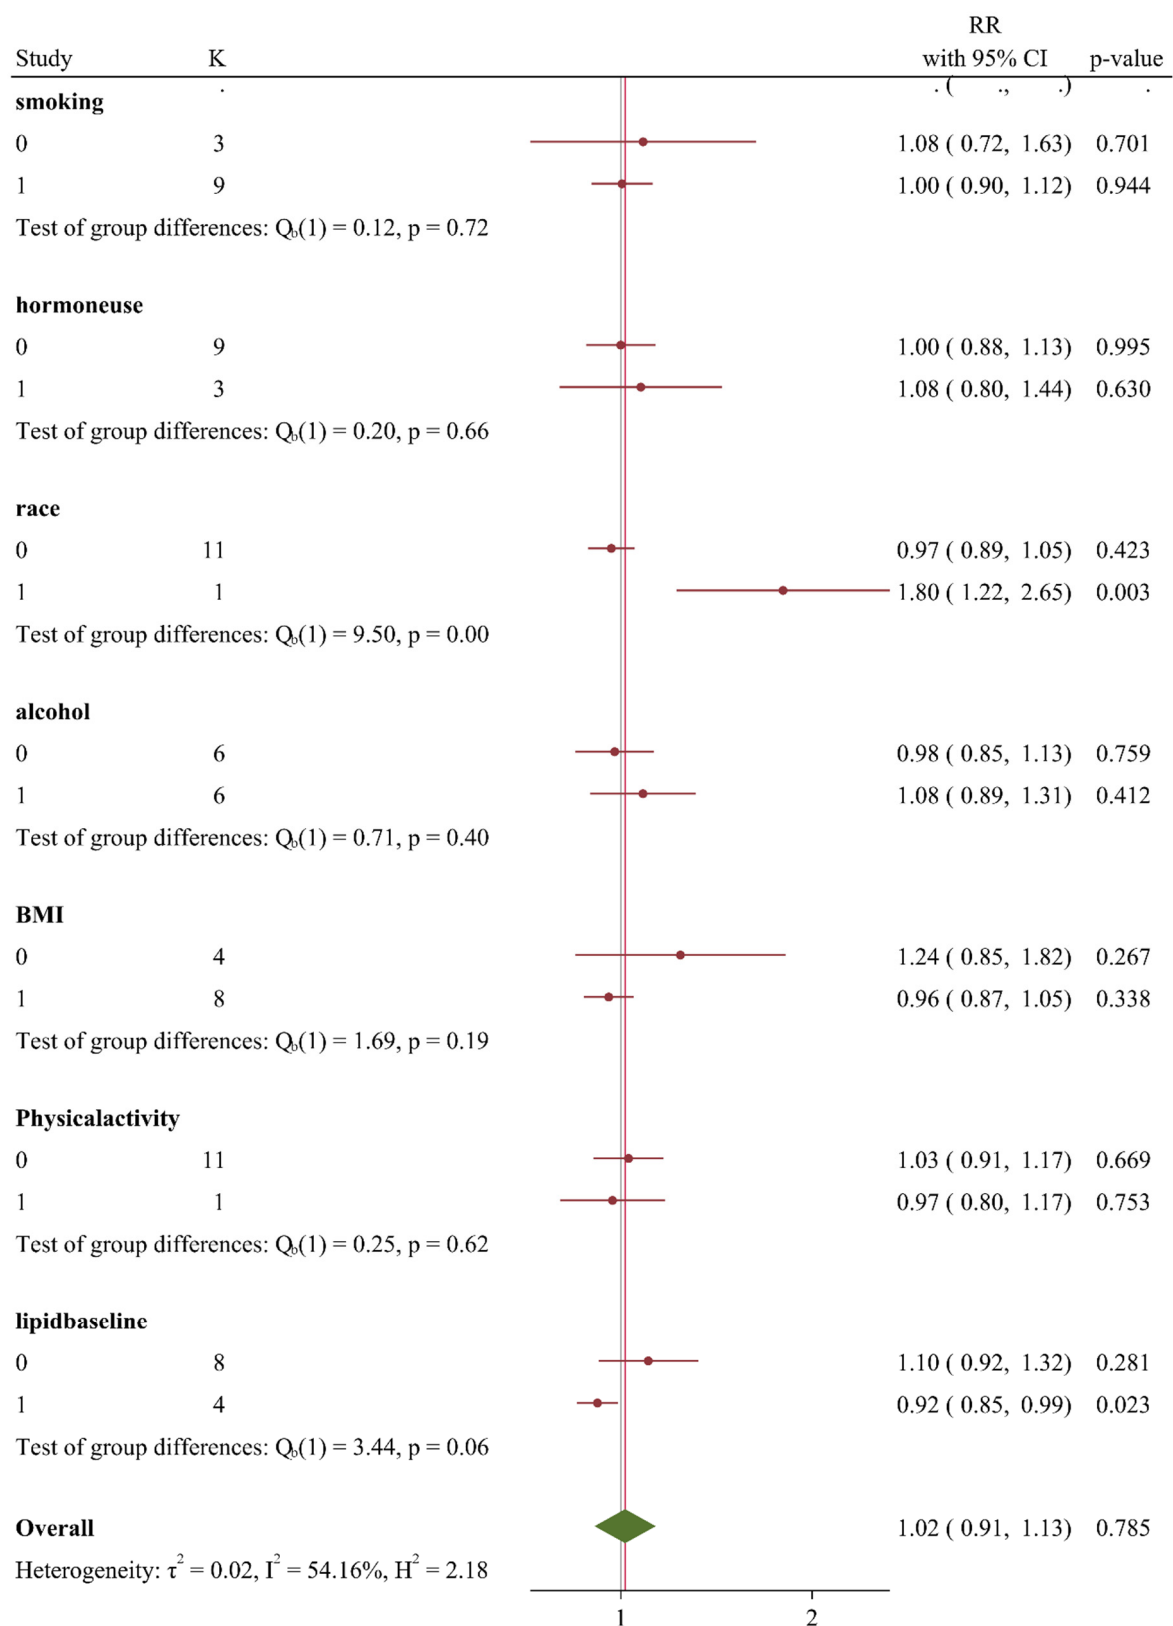

Figure S2. Subgroup analysis for triglyceride.

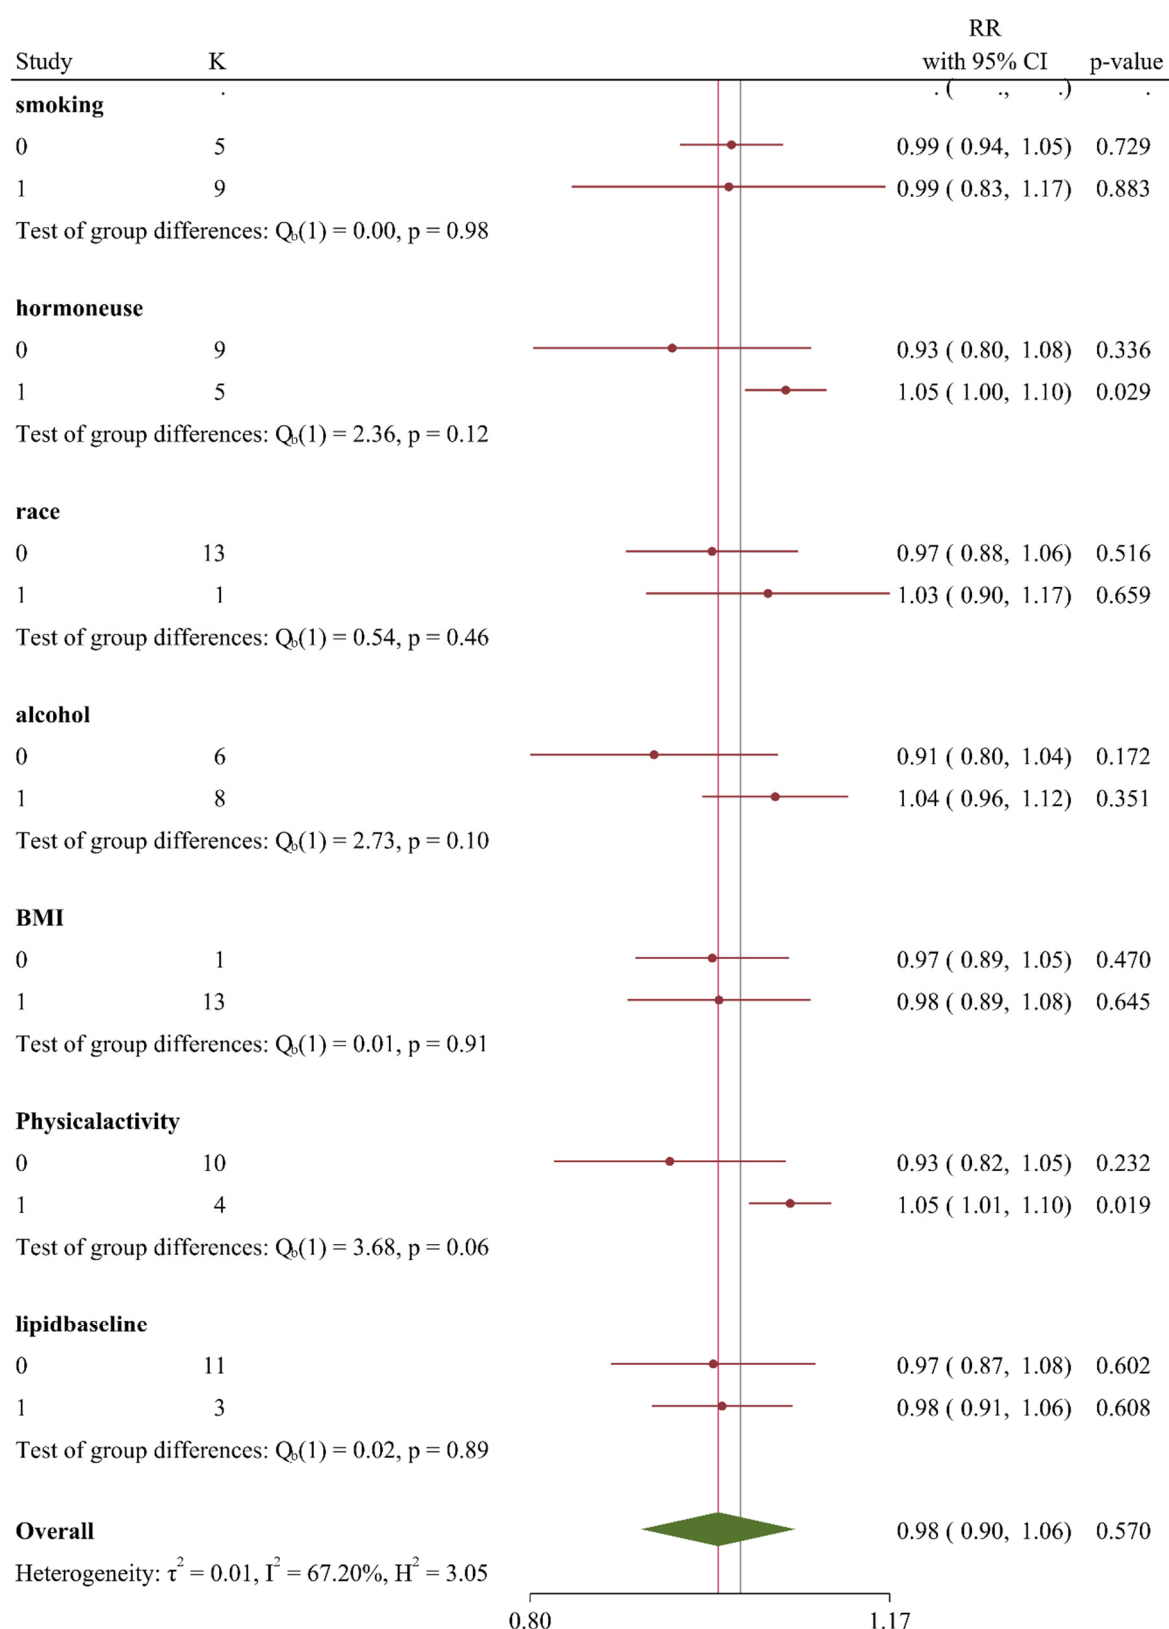

Figure S3. Subgroup analysis for total cholesterol.
